# Supplementary material for: Nano gold decorated reduced graphene oxide wrapped polymethylmethacrylate for supercapacitor applications
Source: Royal Society of Chemistry journal article supplement (doi:10.1039/c6ra26930c), 2017-01-01
Supplement: c6ra26930c1.pdf [file c6ra26930c1.pdf]

## Supporting Information

### Nano Gold Decorated Reduced Graphene Oxide Wrapped Polymethylmethacrylate for Supercapacitor Applications

Gyanaranjan Sahoo, Niladri Sarkar, Deepak Sahu, and Sarat K Swain\*

*Department of Chemistry, Veer Surendra Sai University of Technology, Burla, Sambalpur-768018, Odisha, India*

\* Corresponding author, E-mail: [swainsk2@yahoo.co.in](mailto:swainsk2@yahoo.co.in) Fax: 91-663-2430204, Phone- 91-9937082348

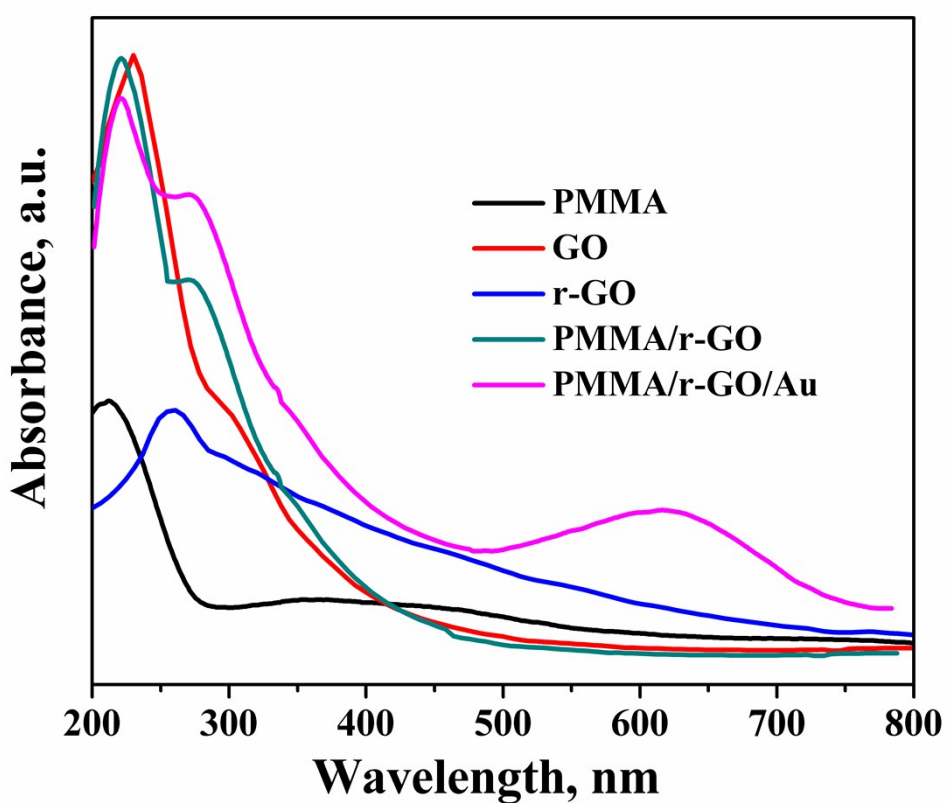

**Fig. S1:** UV visible spectra of GO, r-GO, PMMA, PMMA/r-GO and PMMA/r-GO/Au nanohybrids.

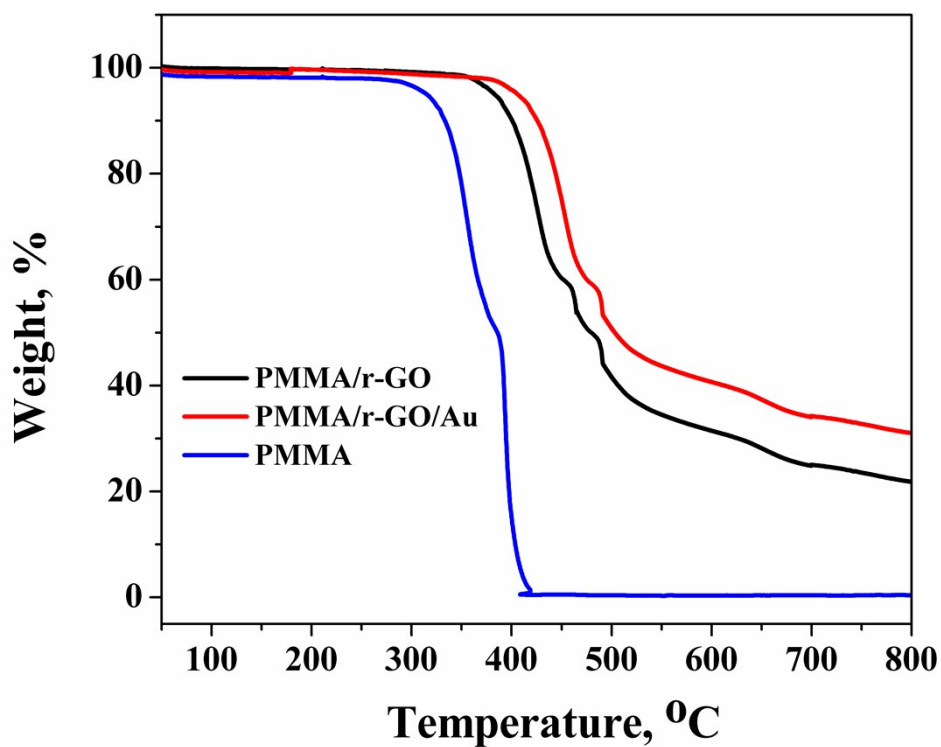

Fig. S2: TGA curves of PMMA, PMMA/r-GO and PMMA/r-GO/Au nanohybrids.

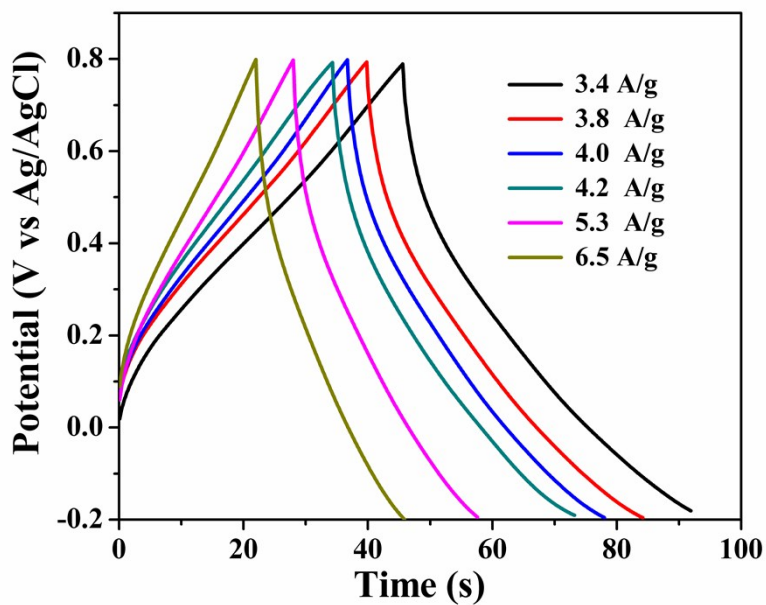

Fig. S3: C/DC curves of PMMA/r-GO/Au nanohybrids at different current densities
